# Supplementary material for: The RhoGAP Stard13 controls insulin secretion through F-actin remodeling
Source: PubMed Central journal article supplement — Mol Metab. 2017 Dec 28;8:96–105. doi: 10.1016/j.molmet.2017.12.013 (PMC5985048; doi:10.1016/j.molmet.2017.12.013), 2017-12-28
Supplement: mmc1.pdf [file mmc1.pdf]

## **SUPPLEMENTARY MATERIAL**

### **The RhoGAP Stard13 controls insulin secretion through F-actin remodeling**

Heike Naumann<sup>1</sup>, Thomas Rathjen<sup>2</sup>, Matthew N. Poy<sup>2</sup>, Francesca M. Spagnoli<sup>1\*</sup>

<sup>1</sup>Lab. of Molecular and Cellular Basis of Embryonic Development, Max-Delbrueck Center for Molecular Medicine, Robert-Roessle Strasse 10, Berlin 13125, Germany; <sup>2</sup>Max-Delbrueck Center for Molecular Medicine, Robert-Roessle Strasse 10, Berlin 13125, Germany

\*corresponding author: [francesca.spagnoli@mdc-berlin.de](mailto:francesca.spagnoli@mdc-berlin.de)

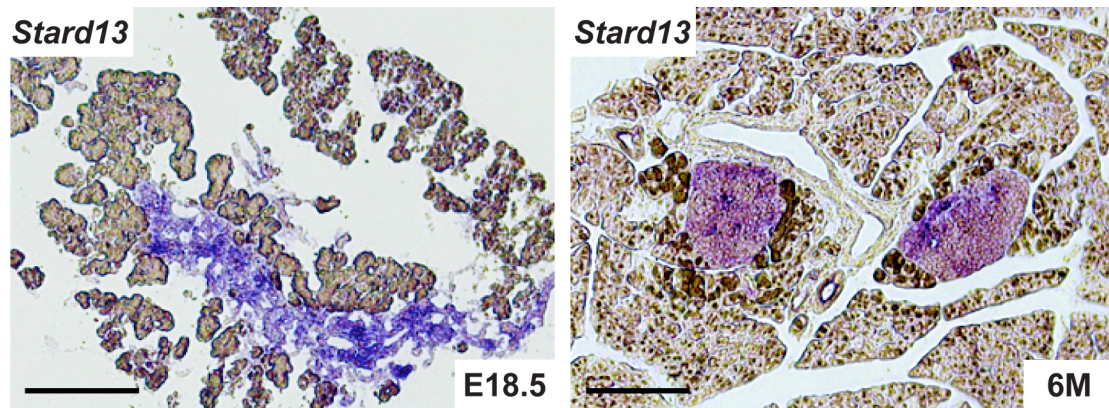

**Supplementary Figure 1. *Stard13* expression in mouse islets.** *In situ* hybridization analysis for *Stard13* on cryosections of mouse E18.5 and adult (6 M) pancreatic tissue. *Stard13* transcript accumulates exclusively in the islets after E17.5 in the mouse. Purple color indicates the expression of the digoxigenin-labelled *Stard13 in situ* RNA probe; in brown, the unstained exocrine pancreatic tissue. Bar, 200um.

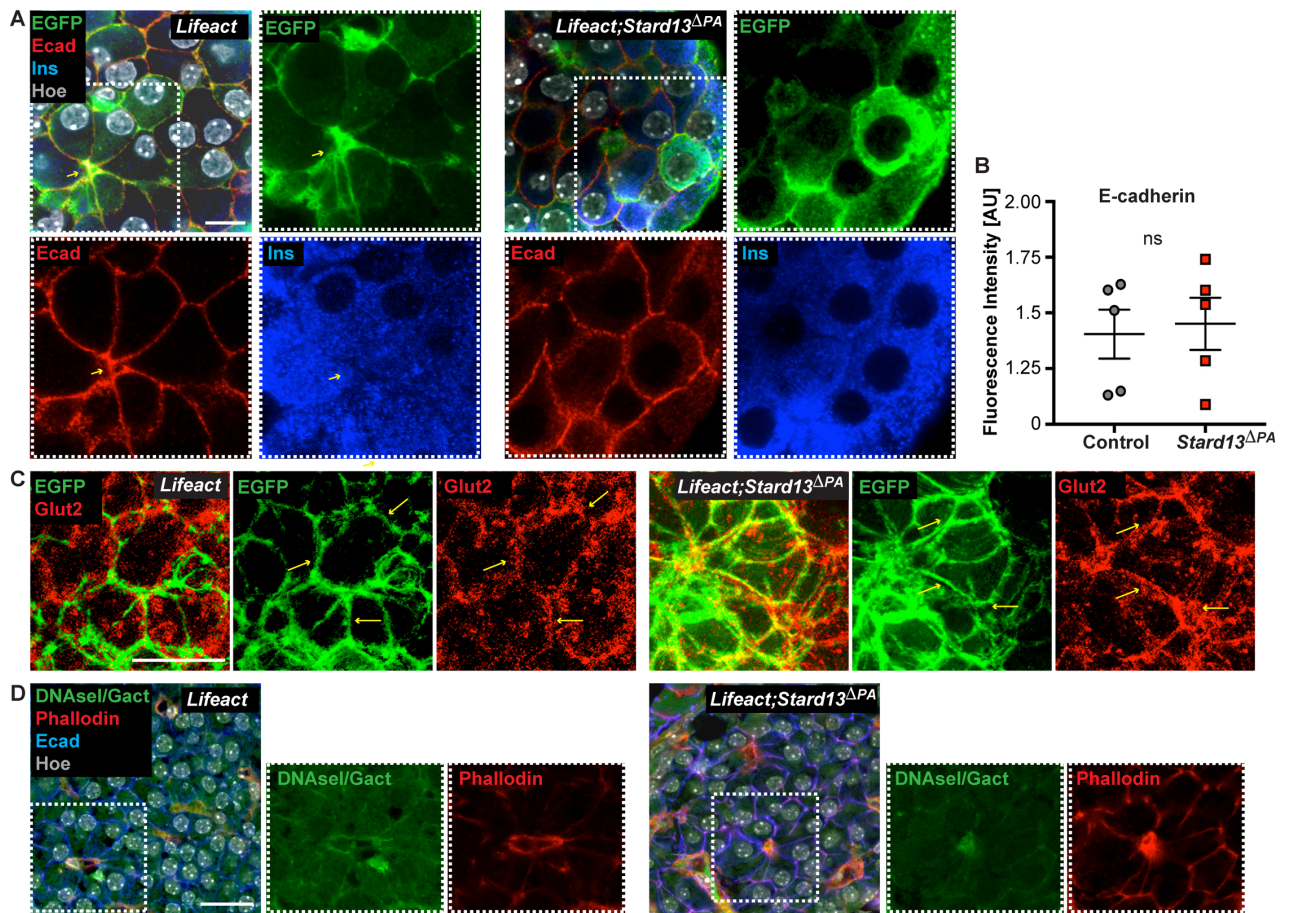

**Supplementary Figure 2. Characterization of islet cells organization in the absence of Stard13.** **A)** Representative single plane confocal images of whole-mount immunofluorescence staining of *Lifeact* control and *Lifeact;Stard13<sup>ΔPA</sup>* mouse islets for E-cadherin (Ecad, red), insulin (Ins, blue) and in green Lifeact-EGFP. Hoechst 33342 was used as nuclear counterstain. Insets show split channels of boxed area; arrows indicate cellular vertex. Bar, 10 μm. **B)** Dot plot quantification of E-cadherin fluorescence intensity in control and *Stard13<sup>ΔPA</sup>* islets. **C)** Whole-mount immunofluorescence staining of *Lifeact* control and *Lifeact;Stard13<sup>ΔPA</sup>* mouse islets for GLUT2 (red) and in green Lifeact-EGFP. Arrows indicate staining along the cell membranes. Bar, 20 μm. **D)** Immunofluorescence analysis on cryosections of control and *Stard13<sup>ΔPA</sup>* adult pancreatic tissues. Phalloidin-Alexa Fluor™ 555 (red) was

used for the detection of filamentous actin (F-actin), Deoxyribonuclease I-Alexa Fluor™ 488 (green) for unpolymerized actin (G-actin) along with E-cadherin (blue) and Hoechst nuclear counterstain (grey). Insets show split channels of boxed area at higher magnification. Bar, 20 um.

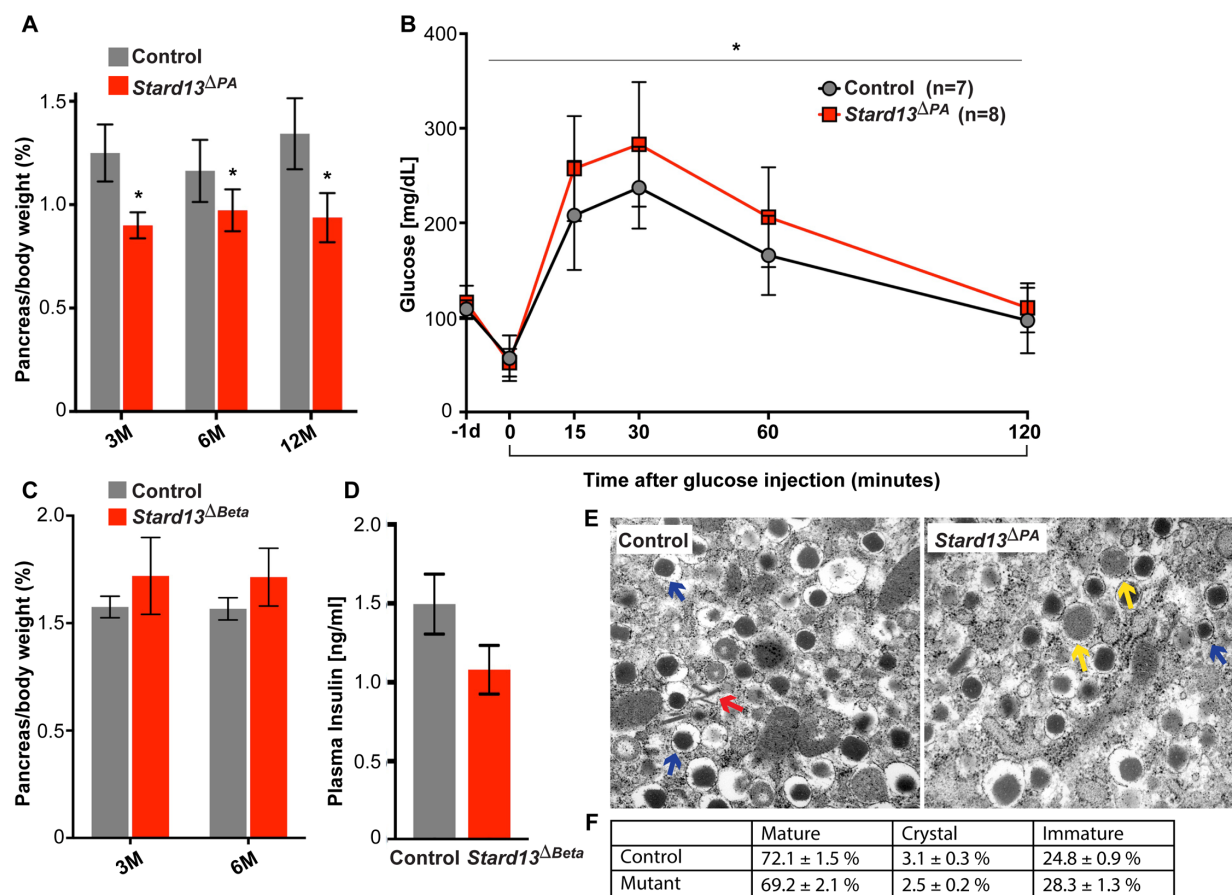

**Supplementary Figure 3. Stard13 regulates glucose metabolism**

**A)** Pancreas weight normalized by body weight in control and *Stard13*<sup>ΔPA</sup> mice at indicated age. M, months. (n = 6-10 per age group, \*\*p < 0.001). **B)** Glucose tolerance test (GTT) was carried out on twelve-month-old male animals that had been fasted overnight, before the day of experimentation (time point -1d on the chart). Animals were injected i.p. with glucose (2g /kg body weight). Glucose levels were measured from blood collected from the tail immediately before the glucose challenge (time point 0) and 15, 30, 60 and 120 minutes after the glucose injection. Data are expressed as means ± s.e.m. ANOVA test, \* p < 0.05. **C)** Pancreas weight normalized by body weight in control and *Stard13*<sup>ΔBeta</sup> mice at six-month age. (n = 5). **D)** Plasma insulin in the random-fed condition is similar between control and *Stard13*<sup>ΔBeta</sup> mice.

(n = 7). **E)** Representative TEM micrographs of islets from control and *Stard13* <sup>$\Delta$ PA</sup> adult mice. Yellow arrows point to immature vesicles; blue arrows point to vesicles containing mature insulin-dense core granules; red arrows point to vesicles containing insulin crystal structures. Magnification x8900. **F)** The percentage of different vesicle morphologies in control and *Stard13* <sup>$\Delta$ PA</sup>  $\beta$ -cells. Quantification was performed by counting the number of each type of vesicle with respect to the total number of vesicles per field (magnification x8900). In total 50  $\beta$ -cells were quantified from three different pancreas per genotype. Data are expressed as means  $\pm$  s.e.m.

**Supplementary Table 1. List of Primary Antibodies**

| <b>Antibody</b>                      | <b>Raised in</b> | <b>Dilution</b> | <b>Source and catalog number</b> |
|--------------------------------------|------------------|-----------------|----------------------------------|
| Deoxyribonuclease I-Alexa Fluor™ 488 |                  | 1:100           | Invitrogen, #D12371              |
| E-cadherin                           | Rat              | 1:500           | Sigma, #U3254                    |
| Glucagon                             | Rabbit           | 1:500           | Immunostar, #20076               |
| Glut2                                | Goat             | 1:200           | Santa Cruz, #sc7580              |
| Insulin                              | Guinea pig       | 1:250           | Invitrogen, #PAI-26938           |
| Phalloidin-Alexa Fluor™ 555          |                  | 1:200           | Invitrogen, #A34055              |
